# Supplementary material for: Artificial Intelligence and Radiologist Burnout
Source: PubMed Central journal article supplement (PMC11584928; doi:10.1001/jamanetworkopen.2024.48714), 2024-11-22
Supplement: jamanetwopen-e2448714-s001.pdf [file jamanetwopen-e2448714-s001.pdf]

# Supplemental Online Content

Liu H, Ding N, Li X, et al. Artificial intelligence and radiologist burnout. *JAMA Netw Open*. 2024;7(11):e2448714. doi:10.1001/jamanetworkopen.2024.48714

**eAppendix 1.** Description of the Sampling Design in the Survey

**eAppendix 2.** Assessment of Workload and AI Acceptance

**eAppendix 3.** Gallup's Employee Engagement Scale

**eAppendix 4.** Statistical Analysis

**eFigure 1.** Flowchart of Study Cohort

**eFigure 2.** Association of AI Use With Burnout and Its Components by Subgroups

**eFigure 3.** Predicted Probability of Burnout for Joint Exposure of AI Use, Workload, and AI Acceptance

**eTable 1.** Distribution of Participants and Response Rate

**eTable 2.** Personal and Professional Characteristics Between Included and Excluded Radiologists

**eTable 3.** Personal and Professional Characteristics after Propensity Score Matching.

**eTable 4.** Weighted Prevalence of Radiologist Burnout Between the AI and Non-AI Groups

**eTable 5.** Dose-Response Association Between the Frequency of AI Use and Burnout in Radiology Practice by Subgroups

**eTable 6.** Dose-Response Association Between the Frequency of AI Use and Emotional Exhaustion in Radiology Practice by Subgroups

**eTable 7.** Dose-Response Association Between the Frequency of AI Use and Depersonalization in Radiology Practice by Subgroups

**eTable 8.** Joint Association of AI Use, Workload, and AI Acceptance With Emotional Exhaustion

**eTable 9.** Joint Association of AI Use, Workload, and AI Acceptance With Depersonalization

**eTable 10.** Association of AI Use With Burnout Adjusting for Workload Factors in Regression Models

**eTable 11.** Association of AI Use With Burnout by Geographic Locations

This supplemental material has been provided by the authors to give readers additional information about their work.

## **eAppendix 1.** Description of the sampling design in the survey.

The sampling design for this survey is based on the the National Center for Quality Control of Radiology (NCQCR), which was established to improve healthcare quality in China. In 2023, China initiated the "National Action Plan for Comprehensive Improvement of Medical Quality (2023-2025)," which aims to enhance the quality of medical services in secondary and tertiary hospitals [1]. As part of this initiative, the National Health Commission of the People's Republic of China announced the first batch of national quality control centers, which includes the specialty of radiology [2]. These centers serve as critical infrastructures for maintaining and improving medical standards, which has been reported by other specialty [3].

The NCQCR operates as a tiered system, comprising four levels: national, provincial, municipal, and county. At the national level, Peking Union Medical College Hospital is designated as the primary center. Each province then selects one tertiary hospital as the provincial quality control center, while each municipality selects a public, secondary or higher-level hospital to serve as the municipal center. Lastly, each county selects a secondary or higher-level hospital as the county-level quality control center. Furthermore, the NCQCR uses a sentinel surveillance approach to establish a regular monitoring system, and sentinel sites are selected based on several criteria as follows: (1) each provincial center selects 10 to 15 hospitals; (2) the hospital must be at least a secondary-level facility; (3) hospitals in tier network or specialized hospitals (e.g., for women and children, cancer, and cardiovascular diseases) should be chosen, with one of each type being selected; (4) hospitals that have demonstrated a strong ability to collaborate on quality control efforts are prioritized. Finally, 392 sentinel hospitals have been established, covering all 31 provinces and the Xinjiang Production and Construction Corps in mainland China. These hospitals serve as the foundation for the quality control network, continuously monitoring radiological practices across the country (**eFigure A1**).

In 2023, there are 3,855 tertiary hospitals and 11,946 secondary hospitals in China [4]. In this study, we selected 392 sentinel hospitals and 751 quality control hospitals at the municipal and county levels that were already established within the four-tier network, bringing the total to 1,143 hospitals. The overall sample size of the survey reached 7.2% of the total number of 2/3 hospitals in mainland China. Radiologists from each hospital were selected according to the following inclusion criteria: (1) 1 to 5 radiologists were chosen per hospital for study participation; (2) participants had a minimum of one year of professional experience because radiologists always need to have at least one year of rotation training as well as psychological adjustments [5-7]; (3) participants joined the hospital below the legal retirement age of 60 because those joining the hospital after the age of 60 have greater flexibility in their working roles; (4) participants were not pregnant at the time of the survey; and (5) participation was voluntary, with all responses being completed through an anonymous survey. The study was approved by the Ethics Committee of the Peking Union Medical College Hospital (No.S-K1538).

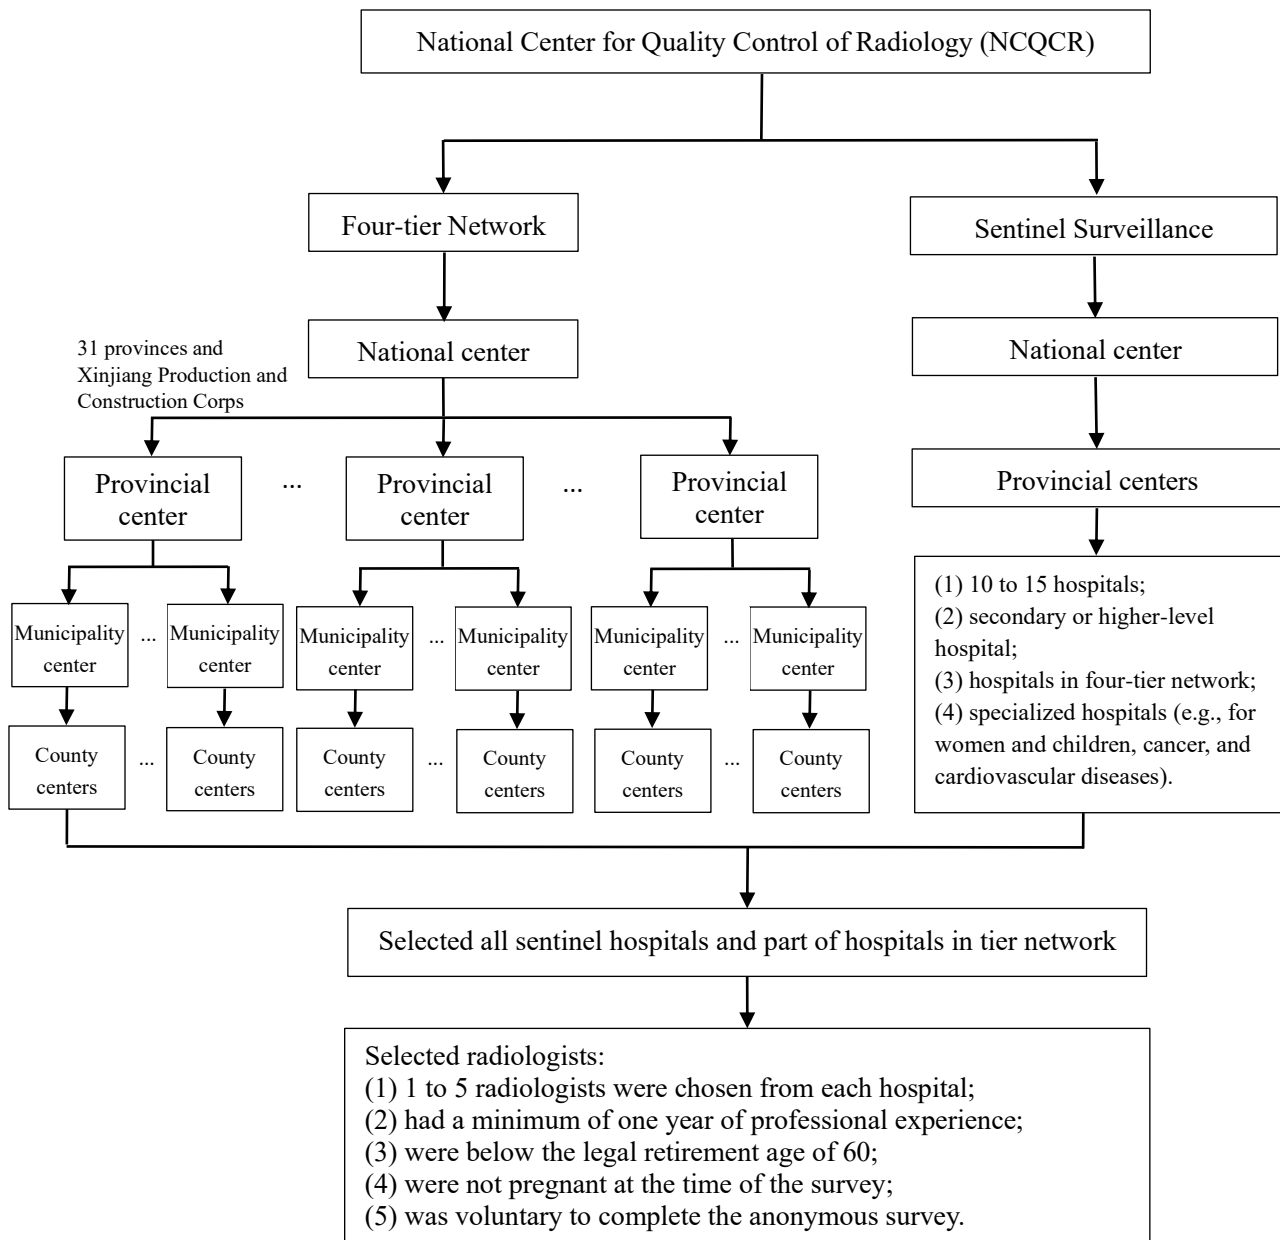

**eFigure A1.** Sampling design in this survey.

**Reference:**

[1] National Health Commission of the People’s Republic of China. Implementing the Action Plan for Comprehensive Improvement of Medical Quality (2023-2025) [In Chinese]. [https://www.gov.cn/zhengce/zhengceku/202305/content\\_6883704.htm](https://www.gov.cn/zhengce/zhengceku/202305/content_6883704.htm). May 26, 2023.

[2] National Health Commission of the People’s Republic of China. Administrative Regulations for Medical Quality Control Centers [In Chinese]. [https://www.gov.cn/zhengce/zhengceku/2023-02/28/content\\_5743657.htm](https://www.gov.cn/zhengce/zhengceku/2023-02/28/content_5743657.htm). February 22, 2023.

[3] Gao L, Li J, Gu Y, Ma L, Xu W, Tao X, et al. Breast ultrasound in Chinese hospitals: A cross-sectional study of the current status and influencing factors of BI-RADS utilization and diagnostic accuracy. *Lancet Reg Health West Pac.* 2022;29:100576.

[4] National Health Commission of the People’s Republic of China. 2023 Statistical Bulletin on

the Development of China's Health and Medical Services [In Chinese]. <http://www.nhc.gov.cn/guihuaxxs/s3585u/202408/6c037610b3a54f6c8535c515844fae96/files/58c5d1e9876344e5b1aa5aa2b083a51a.pdf>. August 26, 2024.

[5] Zhang J, Han X, Yang Z, Wang Z, Zheng J, Yang Z, Zhu J. Radiology residency training in China: results from the first retrospective nationwide survey. *Insights Imaging*. 2021;12(1):25.

[6] Chinese Medical Doctor Association. Contents and Standards of the National Standardized Residency Training [in Chinese]. Available at: <https://www.ccgme-cmda.cn/news/15117/1/article>. August 5, 2022.

[7] Nguyen MT, Henrichsen T, Bhatt A. Exploring your Interest in Radiology: A First-Year Medical Student's Perspective. *Curr Probl Diagn Radiol*. 2022;51(6):813-814.

## eAppendix 2. Assessment of Workload and AI Acceptance.

### 1. Assessment of AI acceptance

According to the Technology Acceptance Model, the acceptance of a new technology was determined by perceived usefulness and perceived ease of use. Use of new technology was directly driven by behavioral intention, which was affected by attitude toward use and perceived usefulness. Therefore, we used AI related knowledge, confidence, attitude, and intention to construct an overall AI acceptance. In our study, we assessed AI-related psychological factors by asking “o you have any knowledge of computer science, computer engineering, or statistics? Yes and I had qualification, Yes but I did not have qualification, No.”, “What do you think is the future of AI in radiology medicine? Very optimistic and AI may reduce radiologist’s workload, very optimistic but fear that AI will replace radiologists, neutrality and AI would not affect the medical field in short time, Pessimistic and AI would have little impact on the medical field.”, “Do you agree that AI could reduce the workload in radiology practice? Agree or disagree.”, and “Do you plan to take the initiative to learn AI-related knowledge or skills? Yes, no, or Not sure”. In order to have enough samples to converge the model, we reclassified these variables into two groups (low and high), considering self-reported classification and sample size within these levels. Then, we constructed AI acceptance with latent class analysis, using R polCA package.

We fitted several models with two through four latent classes and all models converged. Considering the interpretation of latent classes in our analysis, we selected the two-latent class solution. In the two-latent class solution, the AIC is 27530.8, BIC is 27592.1, G<sup>2</sup> is 193.4, and mean posterior probabilities of all latent classes were above 0.70. As shown in below table, latent class 1 was characterized by low-level knowledge and confidence, relatively high attitude, and relatively low intention, which could be defined as “low AI acceptance”; latent class 2 was characterized by high-level knowledge, confidence, attitude, and intention about AI use in radiology, which could be defined as “high AI acceptance”.

**Supplementary table.** Characteristics of different latent class solutions.

|                                    | Latent class |         |         |         | AIC     | BIC      | G <sup>2</sup> |
|------------------------------------|--------------|---------|---------|---------|---------|----------|----------------|
|                                    | Class 1      | Class 2 | Class 3 | Class 4 |         |          |                |
| <b>Two-latent class solution</b>   |              |         |         |         | 27530.8 | 27592.12 | 193.4          |
| Prevalence                         | 0.22         | 0.78    | NA      | NA      |         |          |                |
| Knowledge low                      | 0.73         | 0.47    | NA      | NA      |         |          |                |
| Knowledge high                     | 0.27         | 0.53    | NA      | NA      |         |          |                |
| Confidence low                     | 0.60         | 0.22    | NA      | NA      |         |          |                |
| Confidence high                    | 0.40         | 0.78    | NA      | NA      |         |          |                |
| Attitude low                       | 0.21         | 0.01    | NA      | NA      |         |          |                |
| Attitude high                      | 0.79         | 0.99    | NA      | NA      |         |          |                |
| Intention low                      | 0.58         | 0.06    | NA      | NA      |         |          |                |
| Intention high                     | 0.42         | 0.93    | NA      | NA      |         |          |                |
| <b>Three-latent class solution</b> |              |         |         |         | 27355.1 | 27450.5  | 7.71           |
| Prevalence                         | 0.19         | 0.05    | 0.76    | NA      |         |          |                |

|                                   |      |      |      |      |         |         |        |
|-----------------------------------|------|------|------|------|---------|---------|--------|
| Knowledge low                     | 0.80 | 0.57 | 0.48 | NA   |         |         |        |
| Knowledge high                    | 0.20 | 0.43 | 0.51 | NA   |         |         |        |
| Confidence low                    | 0.44 | 0.99 | 0.25 | NA   |         |         |        |
| Confidence high                   | 0.56 | 0.01 | 0.75 | NA   |         |         |        |
| Attitude low                      | 0.07 | 0.67 | 0.02 | NA   |         |         |        |
| Attitude high                     | 0.93 | 0.33 | 0.98 | NA   |         |         |        |
| Intention low                     | 0.90 | 0.55 | 0.03 | NA   |         |         |        |
| Intention high                    | 0.10 | 0.45 | 0.97 | NA   |         |         |        |
| <b>Four-latent class solution</b> |      |      |      |      | 27357.4 | 27486.8 | 0.0045 |
| Prevalence                        | 0.06 | 0.17 | 0.75 | 0.02 |         |         |        |
| Knowledge low                     | 0.47 | 0.03 | 0.01 | 0.30 |         |         |        |
| Knowledge high                    | 0.53 | 0.97 | 0.99 | 0.70 |         |         |        |
| Confidence low                    | 0.90 | 0.28 | 0.23 | 0.84 |         |         |        |
| Confidence high                   | 0.10 | 0.72 | 0.77 | 0.16 |         |         |        |
| Attitude low                      | 0.43 | 0.03 | 0.01 | 0.30 |         |         |        |
| Attitude high                     | 0.57 | 0.97 | 0.99 | 0.70 |         |         |        |
| Intention low                     | 0.44 | 0.38 | 0.03 | 0.99 |         |         |        |
| Intention high                    | 0.56 | 0.62 | 0.97 | 0.01 |         |         |        |

## 2. Assessment of workload

Because multiple workload factors were interrelated and reflecting different meanings, the overall workload was conducted based on five workload factors, including working hours spent on image interpretation per week, the amount of image interpretation per day, the main device type used in work, the role in the reporting workflow, and hospital level. According to the median of the sample, working hours was categorized as <42 hours and  $\geq$ 42 hours per week, and the amount of image interpretation was categorized as <120 and  $\geq$ 120 per day. The main device type was defined as that radiologist read the most amount of images per day according to radiologists self report. According to the difficulty of image interpretation, the device type was classified as CT or MRI and X-ray. The role in the reporting workflow was categorized as initial or second opinion and both work. The former group represents low workload and the later represents high workload.

For each factor, we assigned 0 point for low workload and 1 point for high workload. The overall workload score was the sum of the points ranging from 0 to 5, with higher scores indicating high workload. We categorized radiologists into three class: low (0-2 point), medium (3 points), and high (4-5 points).

### **eAppendix 3. Gallup's Employee Engagement Scale.**

- Q01 I know what is expected of me at work.
- Q02 I know what is expected of me at work.
- Q03 At work, I have the opportunity to do what I do best every day.
- Q04 In the last seven days, I have received recognition or praise for doing good work.
- Q05 My supervisor, or someone at work, seems to care about me as a person.
- Q06 There is someone at work who encourages my development.
- Q07 At work, my opinions seem to count.
- Q08 The mission or purpose of my company makes me feel my job is important.
- Q09 My associates or fellow employees are committed to doing quality work.
- Q10 I have a best friend at work.
- Q11 In the last six months, someone at work has talked to me about my progress.
- Q12 This last year, I have had opportunities at work to learn and grow.

In the scale, Q3 measures the perception of control in working, Q4 measures the perception of spiritual rewards, Q8 measures the perception of values associated with work, Q5 measures the perception of support from organization, and Q9 measures the perception of support from coworkers. All questions are measured using Likert scale from very agree to very disagree. We classified them into two class: agree (strongly agree or agree) and disagree (neutral, disagree, or strongly disagree).

## **eAppendix 4. Statistical Analysis.**

### **1. Propensity score calculation**

In order to adjust for confounding between the AI and non-AI groups, a propensity score-based analysis strategy was developed. Propensity scores were calculated for individuals in each group using a logistic regression model with the AI group as the dependent variable, adjusted for individual and professional characteristics, workload, AI acceptance, and psychological factors of job satisfaction. For each individual, a predicted probability of belonging to the AI group was calculated, and the propensity score was defined as the inverse of the predicted probability.

### **2. Propensity score-based matching**

Individual matching represents an alternative approach to improving the balance of covariates between the AI and non-AI groups. In this study, radiologists in the AI group were matched 1:1 to the comparison group based on propensity scores. The two groups were matched using the caliper matching algorithm with a caliper value of 0.1 standard deviations. In essence, an individual in the AI group would be matched to a comparison in the non-AI group based on the difference in propensity score, which was lower than the caliper value. In the event that more than one individual met the stipulated criteria, a random allocation process was employed. The proposed methodology would ensure an equitable distribution of covariates between the two groups. Nevertheless, it is possible that some individuals may be excluded from the study due to failure to pair.

### **3. Generalized linear regression model with inverse probability weighting**

We fitted generalized linear regressions to examine the association between AI use and radiologist burnout, adjusting for personal and professional characteristics, workload score, AI acceptance, and psychological factors of job satisfaction. Based on the propensity score and matching, we developed three models: (1) a multivariable model with inverse probability weighting, in which the model was weighted using propensity score; (2) a multivariable model based on matched samples, in which the model was fitted among samples created through propensity score matching using the nearest neighbor method to establish a control group; (3) a multivariable model incorporating the propensity score as an additional covariate. We regarded results from the model (1) as the main analysis and others as sensitivity analyses.

Given that our outcome variable is binary, we employed a logistic regression model. To account for the multistage clustered sampling process, we incorporated random effects at province level to adjust for differences among hospitals in various regions. Due to the non-integer nature of the estimated probability weights, we fitted a negative binomial distribution to accommodate overdispersion [1]. The regression equations were fitted using the `glmmTMB` package in R software to estimate odds ratios (ORs) reflecting the strength of associations. Notably, with a burnout rate exceeding 10%, the ORs may not accurately represent prevalence differences between groups; thus, we further fitted a binomial-log regression model to calculate prevalence ratios (PRs) [2]. Based on the PRs, we estimated additive interactions (relative excess risk due to interaction, RERI) and multiplicative interactions (relative prevalence due to interaction, RPR), employing the Hosmer method to estimate confidence intervals for RERI [3].



**Reference:**

- [1] Coxe S, West SG, Aiken LS. The analysis of count data: a gentle introduction to poisson regression and its alternatives. *J Pers Assess*. 2009;91(2):121-136.
- [2] Petersen MR, Deddens JA. A comparison of two methods for estimating prevalence ratios. *BMC Med Res Methodol*. 2008;8:9.
- [3] Hosmer DW, Lemeshow S. Confidence interval estimation of interaction. *Epidemiology*. 1992;3(5):452-456.

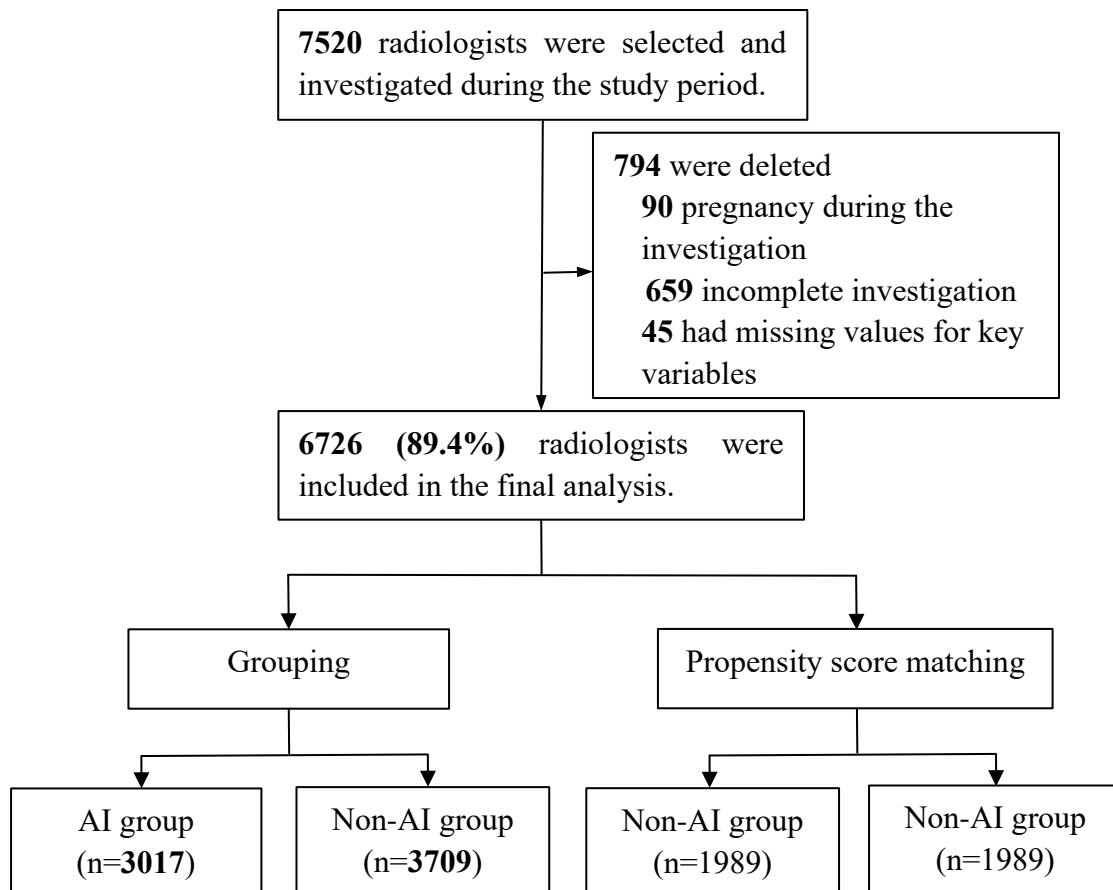

**eFigure 1.** Flowchart of Study Cohort

AI=artificial intelligence.

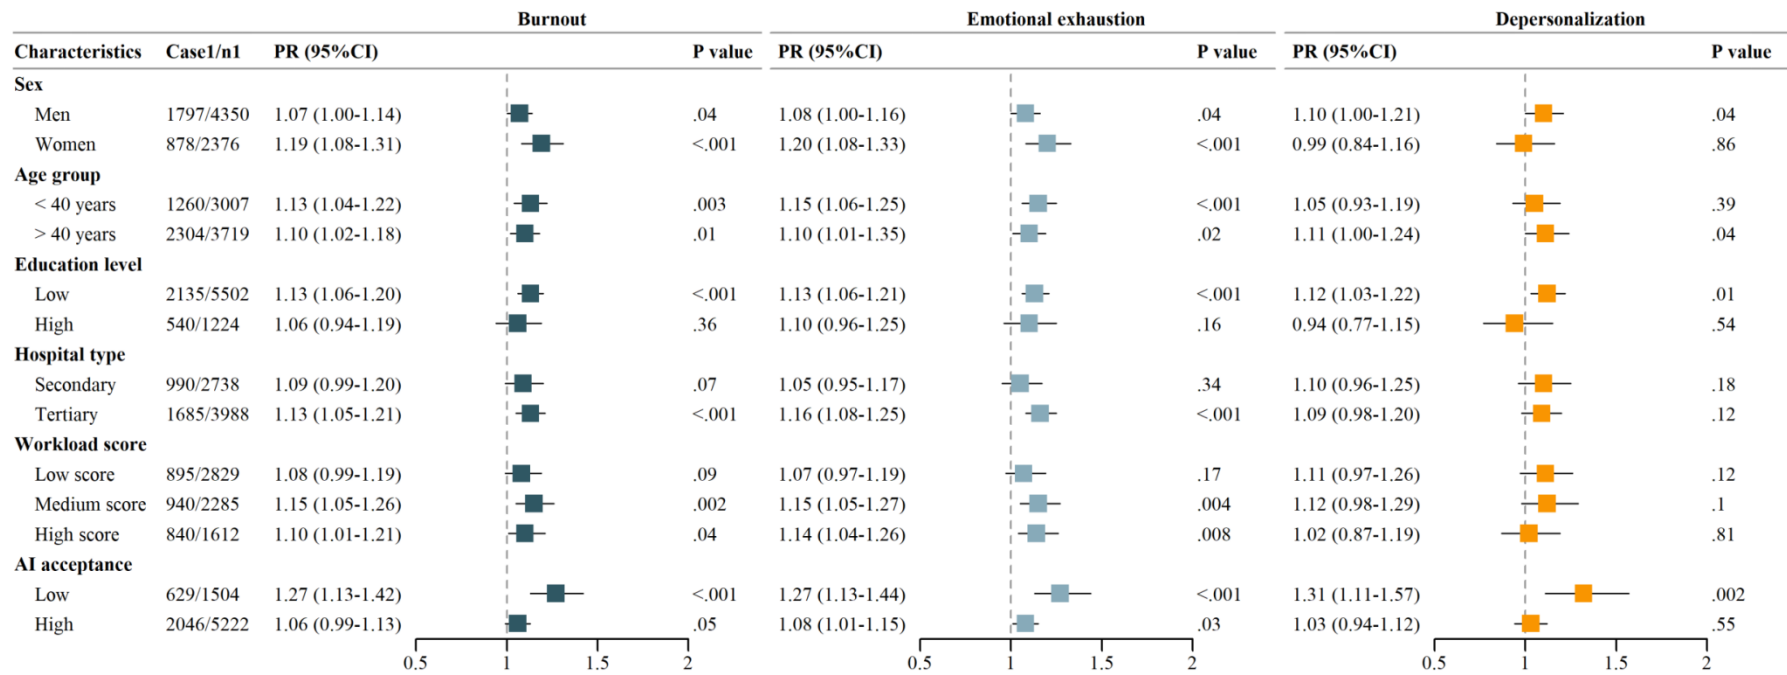

**eFigure 2.** Association of AI Use with Burnout and its Components by Subgroups

Burnout was defined as having at least one symptom of the emotional exhaustion ( $\geq 27$ ) or depersonalization ( $\geq 10$ ). The square point represents PRs, and the bar represents 95%CI. PRs calculated for the joint exposure of AI use and workload score groups by binomial-log regression, adjusting for individual and professional characteristics and psychological factors. All analyses were calculated using inverse propensity weighting.

AI=artificial intelligence. PR=prevalence ratio. CI=confidence interval.

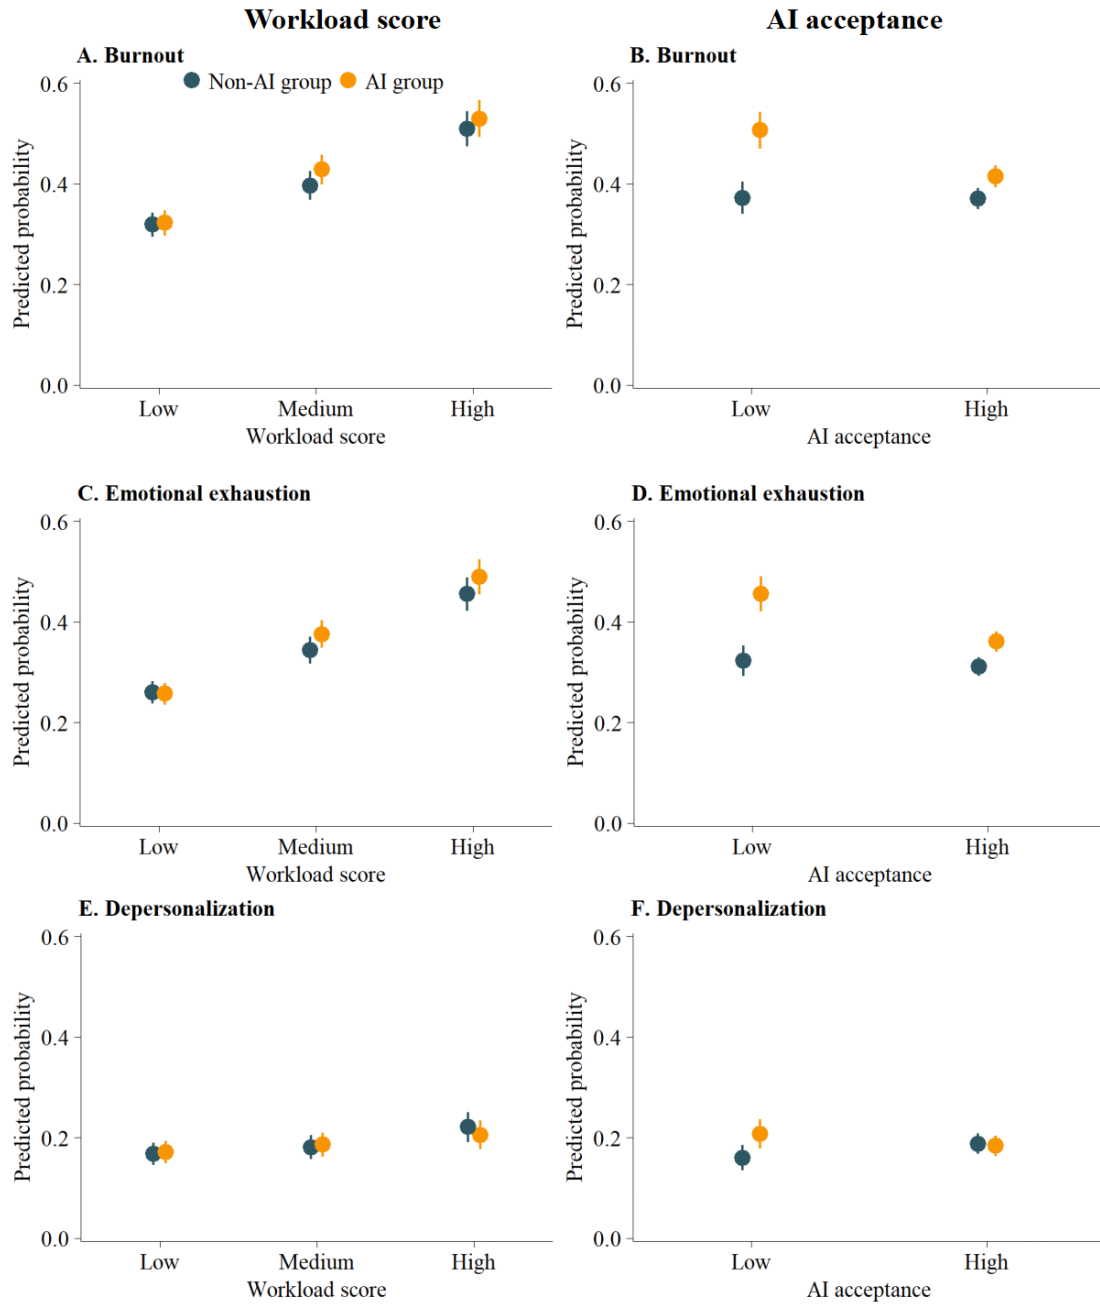

**eFigure 3.** Predicted probability of Burnout for Joint Exposure of AI use, Workload, and AI Acceptance.

Predicted probabilities of burnout were estimated by the generalized linear regression models with IPW and plotted by margineffects package in R statistical software. A interaction term of AI use and workload score or AI acceptance was included in the models.

AI=artificial intelligence. CI=confidence interval.

**eTable 1.** Distribution of Participants and Response Rate

| Province       | Number of hospitals | Participants | Eligible Participants | Response rate (%) |
|----------------|---------------------|--------------|-----------------------|-------------------|
| Anhui          | 36                  | 178          | 158                   | 88.8              |
| Beijing        | 20                  | 135          | 119                   | 88.1              |
| Chongqing      | 17                  | 118          | 105                   | 89.0              |
| Fujian         | 46                  | 299          | 282                   | 94.3              |
| Gansu          | 34                  | 201          | 178                   | 88.6              |
| Guangdong      | 42                  | 231          | 197                   | 85.3              |
| Guangxi        | 54                  | 328          | 300                   | 91.5              |
| Guizhou        | 49                  | 315          | 280                   | 88.9              |
| Hainan         | 29                  | 130          | 115                   | 88.5              |
| Hebei          | 134                 | 902          | 821                   | 91.0              |
| Heilongjiang   | 15                  | 66           | 58                    | 87.9              |
| Henan          | 15                  | 54           | 46                    | 85.2              |
| Hubei          | 82                  | 519          | 460                   | 88.6              |
| Hunan          | 17                  | 63           | 56                    | 88.9              |
| Inter Mongolia | 16                  | 78           | 69                    | 88.5              |
| Jiangsu        | 45                  | 281          | 255                   | 90.7              |
| Jiangxi        | 23                  | 127          | 113                   | 89.0              |
| Jilin          | 59                  | 379          | 336                   | 88.7              |
| Liaoning       | 78                  | 495          | 436                   | 88.1              |
| Ningxia        | 11                  | 59           | 52                    | 88.1              |
| Qinghai        | 14                  | 75           | 67                    | 89.3              |
| Shandong       | 110                 | 711          | 626                   | 88.0              |
| Shanghai       | 3                   | 13           | 12                    | 92.3              |
| Shannxi        | 2                   | 8            | 7                     | 87.5              |
| Shanxi         | 56                  | 350          | 314                   | 89.7              |
| Sichuan        | 77                  | 474          | 437                   | 92.2              |
| Tianjin        | 18                  | 123          | 112                   | 91.1              |
| Xinjiang       | 38                  | 202          | 180                   | 89.1              |
| Xizang         | 8                   | 29           | 23                    | 79.3              |
| Yunnan         | 67                  | 420          | 365                   | 86.9              |
| Zhejiang       | 28                  | 157          | 147                   | 93.6              |

**eTable 2.** Personal and Professional Characteristics between Included and Excluded Radiologists

|                                           | <b>Included<br/>(n=6726)</b> | <b>Excluded<br/>(n=794)</b> | <b>P value</b> |
|-------------------------------------------|------------------------------|-----------------------------|----------------|
| <b>Personal characteristics</b>           |                              |                             |                |
| Age (years)                               | 41.0 (34.0, 48.0)            | 33.0 (28.0, 41.0)           | <.001          |
| Female                                    | 2376 (35.3)                  | 298 (37.5)                  | .22            |
| Having children                           | 5493 (81.7)                  | 491 (69.7)                  | <.001          |
| Geographic region                         |                              |                             | .37            |
| Eastern                                   | 2686 (39.9)                  | 295 (37.2)                  |                |
| Central                                   | 1147 (17.1)                  | 144 (18.2)                  |                |
| Western                                   | 2063 (30.7)                  | 110 (13.9)                  |                |
| Northeast                                 | 830 (12.3)                   | 244 (30.8)                  |                |
| Relationship status                       |                              |                             | <.001          |
| Single                                    | 905 (13.5)                   | 164 (20.7)                  |                |
| Married                                   | 5716 (85.0)                  | 609 (76.7)                  |                |
| Others <sup>a</sup>                       | 105 (1.5)                    | 21 (2.6)                    |                |
| Monthly income, <5000                     | 5447 (80.9)                  | 684 (86.2)                  | <.001          |
| Education levels, low                     | 5502 (81.8)                  | 633 (79.7)                  | .15            |
| <b>Professional characteristics</b>       |                              |                             |                |
| AI use in practice                        | 3017 (44.9)                  | 291 (36.7)                  | <.001          |
| Specialty, breast, chest, or blood vessel | 5513 (82.0)                  | 576 (72.5)                  | <.001          |
| Years in practice (years)                 | 16.0 (8.0, 25.0)             | 10.0 (5.0, 21.0)            | <.001          |
| Hours worked per week (hours)             | 42.0 (40.0, 50.0)            | 40.0 (35.0, 50.0)           | <.001          |
| Numbers of images per day                 | 115 (72, 180)                | 120 (77, 197)               | .01            |
| General hospital                          | 6066 (90.2)                  | 703 (88.5)                  | .14            |
| Senior professional title                 | 2500 (37.2)                  | 191 (24.1)                  | <.001          |
| Main working in practice                  |                              |                             | <.001          |
| X-ray                                     | 2526 (37.6)                  | 333 (41.9)                  |                |
| Computerized tomography                   | 3754 (55.8)                  | 378 (47.6)                  |                |
| MRI                                       | 446 (6.6)                    | 83 (10.5)                   |                |
| Role in the workflow                      |                              |                             | <.001          |
| First opinion                             | 1774 (26.4)                  | 360 (45.3)                  |                |
| Second opinion                            | 1738 (25.8)                  | 136 (17.1)                  |                |
| Both                                      | 3214 (47.8)                  | 298 (37.5)                  |                |
| Attitude toward AI, positive              | 6253 (93.0)                  | 713 (89.8)                  | .001           |
| Knowledge on AI, familiar                 | 3047 (45.3)                  | 432 (54.4)                  | <.001          |

Data are represented as n (%) or median (inter-quarter range). <sup>a</sup> Others include divorce, separation, widowed or widower. AI=artificial intelligence.

**eTable 3. Personal and Professional Characteristics after Propensity Score Matching**

|                                           | Propensity score matching |                         |
|-------------------------------------------|---------------------------|-------------------------|
|                                           | AI group<br>(n=1989)      | No AI group<br>(n=1989) |
| <b>Personal characteristics</b>           |                           |                         |
| Age (years)                               | 40 (34, 48)               | 40 (34, 48)             |
| Female                                    | 723 (36.4)                | 717 (36.1)              |
| Male                                      | 1266 (63.6)               | 1272 (63.9)             |
| Having children                           | 1622 (81.6)               | 1635 (82.2)             |
| Geographic region                         |                           |                         |
| Eastern                                   | 893 (44.9)                | 819 (41.2)              |
| Central                                   | 337 (16.9)                | 326 (16.4)              |
| Western                                   | 507 (25.5)                | 600 (30.2)              |
| Northeast                                 | 252 (12.7)                | 244 (12.3)              |
| Relationship status                       |                           |                         |
| Single                                    | 265 (13.3)                | 268 (13.5)              |
| Married                                   | 1695 (85.2)               | 1682 (84.6)             |
| Others <sup>a</sup>                       | 29 (1.5)                  | 39 (2.0)                |
| Monthly income, <5000                     | 1624 (81.7)               | 1637 (82.3)             |
| Education levels, low                     | 1630 (82.0)               | 1679 (84.4)             |
| <b>Professional characteristics</b>       |                           |                         |
| Specialty, breast, chest, or blood vessel | 1671 (84.0)               | 1617 (81.3)             |
| Years in practice (years)                 | 16.0 (8.0-25.0)           | 16.0 (9.0-25.0)         |
| Hours worked per week (hours)             | 43.5 (40.0-50.0)          | 42.0 (40.0-50.0)        |
| Numbers of images per day                 | 123 (80-193)              | 120 (80-189)            |
| General hospital                          | 1868 (93.9)               | 1755 (88.2)             |
| Senior professional title                 | 1186 (59.6)               | 1250 (62.9)             |
| Main working in practice                  |                           |                         |
| X-ray                                     | 729 (36.7)                | 662 (33.3)              |
| Computerized tomography                   | 1133 (57.0)               | 1193 (60.0)             |
| MRI                                       | 127 (6.4)                 | 134 (6.4)               |
| Role in practice                          |                           |                         |
| Initial report                            | 497 (25.0)                | 543 (27.3)              |
| Final report                              | 593 (29.8)                | 482 (24.2)              |
| Both                                      | 899 (45.2)                | 964 (48.5)              |
| Attitude toward AI, positive              | 1923 (96.7)               | 1792 (90.1)             |
| Knowledge on AI, familiar                 | 970 (48.8)                | 876 (44.0)              |

**eTable 4.** Weighted Prevalence of Radiologist Burnout between the AI and Non-AI Groups

|                              | AI group         | Non-AI group     | P     |
|------------------------------|------------------|------------------|-------|
| Sex                          |                  |                  |       |
| Male                         | 43.8 (41.3-36.4) | 41.4 (39.1-43.7) | .16   |
| Female                       | 39.9 (36.6-43.1) | 33.2 (30.1-36.3) | .004  |
| Age group                    |                  |                  |       |
| <40 years                    | 44.6 (41.8-47.5) | 40.1 (37.1-43.1) | .03   |
| ≥40 years                    | 40.6 (37.8-43.4) | 37.2 (34.9-35.9) | .06   |
| Education level <sup>a</sup> |                  |                  |       |
| Low                          | 41.9 (39.5-44.2) | 36.9 (35.2-38.6) | <.001 |
| High                         | 44.9 (41.6-48.3) | 45.1 (38.8-51.5) | .96   |
| Monthly income               |                  |                  |       |
| <5000                        | 42.9 (40.6-45.3) | 38.0 (36.2-39.7) | <.001 |
| ≥5000                        | 40.6 (34.6-46.6) | 40.2 (36.8-43.5) | .91   |
| Workload score               |                  |                  |       |
| Low score                    | 33.3 (29.8-36.9) | 31.3 (29.2-33.3) | .32   |
| Medium score                 | 44.7 (41.6-47.8) | 38.7 (35.5-41.9) | .008  |
| High score                   | 54.6 (51.4-57.9) | 50.3 (45.5-54.9) | .13   |
| AI acceptance                |                  |                  |       |
| Low                          | 49.7 (44.3-55.0) | 37.4 (34.4-40.5) | <.001 |
| High                         | 40.4 (38.3-42.4) | 38.8 (36.6-41.0) | .30   |

Data are represented as prevalence with 95%CI. The prevalence was estimated using inverse probability weighting and 95%CI was estimated by bootstrap method. *P* value was test using Rao—scott  $\chi^2$  considering the variances within provinces. <sup>a</sup> Education level was categorized as bachelor’s degree and below and graduate degree and above.



**eTable 5.** Does-response Association between the Frequency of AI Use and Burnout in Radiology Practice by Subgroups

|                              | Number    | Regularly vs. no              |                      | Consistently vs. no           |         |
|------------------------------|-----------|-------------------------------|----------------------|-------------------------------|---------|
|                              |           | OR (95%CI)                    | P value <sup>a</sup> | OR (95%CI)                    | P value |
| Sex                          |           |                               |                      |                               |         |
| Male                         | 1797/4350 | 1.10 (0.97-1.24)              | .15                  | 1.68 (1.24-2.28) <sup>b</sup> | .002    |
| Female                       | 878/2376  | 1.37 (1.15-1.63) <sup>b</sup> | .001                 | 1.35 (0.96-1.91)              | .09     |
| Age group                    |           |                               |                      |                               |         |
| <40 years                    | 1260/3007 | 1.23 (1.05-1.43) <sup>b</sup> | .01                  | 1.53 (1.10-2.12) <sup>b</sup> | .01     |
| ≥40 years                    | 2304/3719 | 1.16 (1.01-1.32) <sup>b</sup> | .03                  | 1.48 (1.09-2.01) <sup>b</sup> | .02     |
| Education level <sup>a</sup> |           |                               |                      |                               |         |
| Low                          | 2135/5502 | 1.19 (1.07-1.33) <sup>b</sup> | .002                 | 1.57 (1.22-2.02) <sup>b</sup> | <.001   |
| High                         | 540/1224  | 1.26 (0.97-1.64)              | .18                  | 1.10 (0.68-1.77)              | .69     |
| Hospital type                |           |                               |                      |                               |         |
| Secondary                    | 990/2738  | 1.14 (0.96-1.34)              | .14                  | 1.42 (0.89-2.28)              | .14     |
| Tertiary                     | 1685/3988 | 1.23 (1.08-1.40) <sup>b</sup> | .003                 | 1.48 (1.15-1.92) <sup>b</sup> | .003    |
| Workload score               |           |                               |                      |                               |         |
| Low score                    | 895/2829  | 1.09 (0.94-1.27)              | .24                  | 1.73 (1.20-2.49) <sup>b</sup> | .007    |
| Medium score                 | 940/2285  | 1.32 (1.11-1.58) <sup>b</sup> | .003                 | 1.24 (0.87-1.74)              | .23     |
| High score                   | 840/1612  | 1.27 (1.01-1.61)              | .05                  | 1.60 (1.00-2.56) <sup>b</sup> | .04     |
| AI acceptance                |           |                               |                      |                               |         |
| Low                          | 629/1504  | 1.55 (1.24-1.92) <sup>b</sup> | <.001                | 2.50 (1.33-4.71) <sup>b</sup> | .005    |
| High                         | 2046/5222 | 1.10 (0.98-1.24)              | .09                  | 1.30 (1.02-1.65)              | .06     |

ORs were adjusted for individual and professional characteristics, psychological factors, workload score, and AI acceptance, with the exception of stratified variables, which were mutually adjusted. All analyses were calculated using inverse propensity weighting.

<sup>a</sup> Education level was categorized as bachelor's degree and below and graduate degree and above. <sup>b</sup> *P* < .05 with multiple testing correction by Hochberg method.

AI=artificial intelligence. OR=odds ratio. CI=confidence interval.

**eTable 6.** Does-response Association between the Frequency of AI Use and Emotional Exhaustion in Radiology Practice by Subgroups

|                              | Number    | Regularly vs. no              |       | Consistently vs. no           |         |
|------------------------------|-----------|-------------------------------|-------|-------------------------------|---------|
|                              |           | OR (95%CI)                    | P     | OR (95%CI)                    | P value |
| Sex                          |           |                               |       |                               |         |
| Male                         | 1511/4350 | 1.08 (0.95-1.23)              | .21   | 1.63 (1.21-2.18) <sup>b</sup> | .002    |
| Female                       | 800/2376  | 1.38 (1.15-1.64) <sup>b</sup> | <.001 | 1.37 (0.97-1.93)              | .08     |
| Age group                    |           |                               |       |                               |         |
| <40 years                    | 1121/3007 | 1.24 (1.06-1.45) <sup>b</sup> | .007  | 1.54 (1.11-2.14) <sup>b</sup> | .002    |
| ≥40 years                    | 1190/3719 | 1.15 (1.00-1.31) <sup>b</sup> | .04   | 1.43 (1.05-1.94) <sup>b</sup> | .04     |
| Education level <sup>a</sup> |           |                               |       |                               |         |
| Low                          | 1822/5502 | 1.18 (1.06-1.32) <sup>b</sup> | .003  | 1.55 (1.21-1.98) <sup>b</sup> | .001    |
| High                         | 489/1224  | 1.33 (1.02-1.73)              | .71   | 1.23 (0.75-2.10)              | .41     |
| Hospital type                |           |                               |       |                               |         |
| Secondary                    | 829/2738  | 1.06 (0.89-1.25)              | .51   | 1.36 (0.85-2.20)              | .41     |
| Tertiary                     | 1482/3988 | 1.29 (1.13-1.47) <sup>b</sup> | <.001 | 1.52 (1.18-1.96) <sup>b</sup> | .001    |
| Workload score               |           |                               |       |                               |         |
| Low score                    | 724/2829  | 1.07 (0.91-1.25)              | .40   | 1.53 (1.06-2.21) <sup>b</sup> | .04     |
| Medium score                 | 824/2285  | 1.30 (1.10-1.54) <sup>b</sup> | .005  | 1.23 (0.87-1.74)              | .24     |
| High score                   | 763/1612  | 1.35 (1.07-1.69) <sup>b</sup> | .02   | 1.74 (1.10-2.75) <sup>b</sup> | .02     |
| AI acceptance                |           |                               |       |                               |         |
| Low                          | 522/1504  | 1.50 (1.21-1.86) <sup>b</sup> | <.001 | 2.68 (1.43-5.02) <sup>b</sup> | .002    |
| High                         | 1759/5222 | 1.12 (0.99-1.25)              | .06   | 1.26 (0.99-1.60)              | .06     |

ORs were adjusted for individual and professional characteristics, psychological factors, workload score, and AI acceptance, with the exception of stratified variables, which were mutually adjusted. All analyses were calculated using inverse propensity weighting.

<sup>a</sup> Education level was categorized as bachelor's degree and below and graduate degree and above. <sup>b</sup> *P* < .05 with multiple testing correction by Hochberg method.

Abbreviation: AI=artificial intelligence. OR=odds ratio. CI=confidence interval.

**eTable 7.** Does-response Association between the Frequency of AI Use and Depersonalization in Radiology Practice by Subgroups.

|                              | Number    | Regularly vs. no              |         | Consistently vs. no           |         |
|------------------------------|-----------|-------------------------------|---------|-------------------------------|---------|
|                              |           | OR (95%CI)                    | P value | OR (95%CI)                    | P value |
| Sex                          |           |                               |         |                               |         |
| Male                         | 905/4350  | 1.06 (0.93-1.20)              | .37     | 1.84 (1.40-2.41) <sup>b</sup> | <.001   |
| Female                       | 309/2376  | 0.96 (0.79-1.18)              | .72     | 1.24 (0.83-1.86)              | .58     |
| Age group                    |           |                               |         |                               |         |
| <40 years                    | 541/3007  | 1.03 (0.87-1.21)              | .75     | 1.48 (1.07-2.05) <sup>b</sup> | .03     |
| ≥40 years                    | 673/3719  | 1.08 (0.94-1.25)              | .27     | 1.72 (1.27-2.34) <sup>b</sup> | .001    |
| Education level <sup>a</sup> |           |                               |         |                               |         |
| Low                          | 1013/5502 | 1.09 (0.97-1.23)              | .13     | 1.68 (1.32-2.15) <sup>b</sup> | .002    |
| High                         | 201/1224  | 0.90 (0.69-1.20)              | .51     | 1.19 (0.73-1.95)              | .51     |
| Hospital type                |           |                               |         |                               |         |
| Secondary                    | 496/2738  | 1.06 (0.89-1.27)              | .53     | 1.37 (0.85-2.20)              | .39     |
| Tertiary                     | 718/3988  | 1.06 (0.92-1.22)              | .40     | 1.60 (1.24-2.05) <sup>b</sup> | <.001   |
| Workload score               |           |                               |         |                               |         |
| Low score                    | 469/2829  | 1.06 (0.90-1.25)              | .50     | 1.89 (1.29-2.77) <sup>b</sup> | <.001   |
| Medium score                 | 409/2285  | 1.14 (0.95-1.37)              | .16     | 1.35 (0.93-1.95)              | .16     |
| High score                   | 336/1612  | 0.94 (0.76-1.17)              | .60     | 1.71 (1.14-2.58) <sup>b</sup> | .02     |
| AI acceptance                |           |                               |         |                               |         |
| Low                          | 263/1504  | 1.43 (1.13-1.79) <sup>b</sup> | .005    | 1.45 (0.81-2.58)              | .22     |
| High                         | 951/5222  | 0.97 (0.86-1.10)              | .63     | 1.54 (1.22-1.96) <sup>b</sup> | <.001   |

Models were adjusted for individual and professional characteristics, psychological factors, workload score, and AI acceptance, with the exception of stratified variables, which were mutually adjusted. All analyses were calculated using inverse propensity weighting.

<sup>a</sup> Education level was categorized as bachelor's degree and below and graduate degree and above. <sup>b</sup> *P* < .05 with multiple testing correction by Hochberg method.

Abbreviation: AI=artificial intelligence. OR=odds ratio. CI=confidence interval.

**eTable 8.** Joint Association of AI use, Workload Score, and AI Acceptance with Emotional Exhaustion

| Characteristics       | Case/n    | PR (95%CI)       | P value | RERI (95%CI)           | RPR (95%CI)      |
|-----------------------|-----------|------------------|---------|------------------------|------------------|
| <b>Workload score</b> |           |                  |         |                        |                  |
| Low workload score    |           |                  |         |                        |                  |
| Non-AI group          | 509/1974  | 1 (ref)          | ..      | ..                     |                  |
| AI group              | 215 /855  | 1.07 (0.97-1.19) | .18     | ..                     |                  |
| Medium workload score |           |                  |         |                        |                  |
| Non-AI group          | 386/1116  | 1.27 (1.15-1.41) | <.001   | ..                     | ..               |
| AI group              | 438/1169  | 1.48 (1.34-1.63) | <.001   | 0.13 (-0.04 to 0.29)   | 1.08 (0.94-1.24) |
| High workload score   |           |                  |         |                        |                  |
| Non-AI group          | 276/619   | 1.60 (1.44-1.77) | <.001   | ..                     | ..               |
| AI group              | 487/993   | 1.81 (1.63-2.00) | <.001   | 0.14 (-0.06 to 0.33)   | 1.05 (0.91-1.22) |
| <b>AI acceptance</b>  |           |                  |         |                        |                  |
| Low acceptance        |           |                  |         |                        |                  |
| Non-AI group          | 347/1064  | 1 (ref)          |         |                        |                  |
| AI group              | /440/1504 | 1.28 (1.14-1.44) | <.001   | ..                     | ..               |
| High acceptance       |           |                  |         |                        |                  |
| Non-AI group          | 824/2645  | 1.09 (0.98-1.20) | .10     | ..                     | ..               |
| AI group              | 935/2577  | 1.17 (1.06-1.30) | .004    | -0.20 (-0.36 to -0.03) | 0.84 (0.73-0.96) |

Prevalence ratios were calculated for the joint exposure of AI use and workload score groups by binomial-log regression, adjusting for individual and professional characteristics and psychological factors. All analyses were calculated using inverse propensity weighting. RERI was estimated using the following formula:  $PR_{11} - PR_{10} - PR_{01} + 1$ . RPR:  $PR_{11} / (PR_{01} \times PR_{10})$ . *P* value was corrected by Hochberg method.

Abbreviation: PR=prevalence ratio. AI=artificial intelligence. RERI=relative excess risk due to interaction. RPR=ratio of prevalence ratio. CI=confidence interval.

**eTable 9.** Joint Association of AI Use, Workload, and AI Acceptance with Depersonalization

| Characteristics       | n/N (%)   | PR (95%CI)       | P value | RERI (95%CI)           | RPR (95%CI)      |
|-----------------------|-----------|------------------|---------|------------------------|------------------|
| <b>Workload score</b> |           |                  |         |                        |                  |
| Low workload score    |           |                  |         |                        |                  |
| Non-AI group          | 629/1974  | 1 (ref)          | ..      | ..                     |                  |
| AI group              | 266/855   | 1.11 (0.98-1.27) | .20     | ..                     |                  |
| Medium workload score |           |                  |         |                        |                  |
| Non-AI group          | 444/1116  | 1.07 (0.93-1.23) | .33     | ..                     | ..               |
| AI group              | 496/1169  | 1.21 (1.06-1.39) | .01     | 0.03 (-0.17 to 0.23)   | 1.02 (0.85-1.23) |
| High workload score   |           |                  |         |                        |                  |
| Non-AI group          | 309/619   | 1.27 (1.10-1.47) | .004    | ..                     | ..               |
| AI group              | 531/993   | 1.26 (1.09-1.46) | .006    | -0.13 (-0.36 to 0.11)  | 0.89 (0.73-1.08) |
| <b>AI acceptance</b>  |           |                  |         |                        |                  |
| Low acceptance        |           |                  |         |                        |                  |
| Non-AI group          | 404/1064  | 1 (ref)          |         |                        |                  |
| AI group              | 225/440   | 1.36 (1.14-1.61) | <.001   | ..                     | ..               |
| High acceptance       |           |                  |         |                        |                  |
| Non-AI group          | 978/2645  | 1.24 (1.08-1.44) | .003    | ..                     | ..               |
| AI group              | 1068/2577 | 1.27 (1.10-1.47) | .002    | -0.33 (-0.58 to -0.08) | 0.75 (0.62-0.91) |

Prevalence ratios were calculated for the joint exposure of AI use and workload score groups by binomial-log regression, adjusting for individual and professional characteristics and psychological factors. All analyses were calculated using inverse propensity weighting. RERI was estimated using the following formula:  $PR_{11} - PR_{10} - PR_{01} + 1$ . RPR:  $PR_{11} / (PR_{01} \times PR_{10})$ . P value was corrected by Hochberg method.

Abbreviation: PR=prevalence ratio. AI=artificial intelligence. RERI=relative excess risk due to interaction. RPR=ratio of prevalence ratio. CI=confidence interval.

**eTable 10.** Association of AI Use with Burnout Adjusting for Each Workload Factor in Regression Models

|                                                           | <b>Model 1:<br/>Multivariable<br/>analysis</b> | <b>Model 2: Inverse<br/>probability<br/>weighting</b> | <b>Model 3:<br/>Propensity score<br/>matching</b> |
|-----------------------------------------------------------|------------------------------------------------|-------------------------------------------------------|---------------------------------------------------|
| AI use in practice, vs. Never or irregularly              | 1.18 (1.05-1.32) <sup>b</sup>                  | 1.13 (1.02-1.25) <sup>b</sup>                         | 1.18 (1.03-1.35) <sup>b</sup>                     |
| Age (per one year increase)                               | 0.99 (0.98-1.01)                               | 1.00 (0.99-1.01)                                      | 0.99 (0.99-1.01)                                  |
| Sex, male vs. female                                      | 1.46 (1.29-1.64) <sup>b</sup>                  | 1.52 (1.37-1.69) <sup>d</sup>                         | 1.48 (1.27-1.73) <sup>b</sup>                     |
| Geographic regions, vs. West                              |                                                |                                                       |                                                   |
| East                                                      | 1.23 (1.08-1.40)                               | 1.18 (1.03-1.35) <sup>b</sup>                         | 1.21 (1.02-1.43) <sup>b</sup>                     |
| Central                                                   | 1.02 (0.86-1.19)                               | 1.04 (0.88-1.24)                                      | 1.06 (0.86-1.31)                                  |
| Northeast                                                 | 1.10 (0.91-1.31)                               | 0.98 (0.81-1.19)                                      | 1.09 (0.86-1.39)                                  |
| Child, yes vs. no                                         | 0.87 (0.73-1.02)                               | 0.86 (0.73-0.99)                                      | 0.86 (0.69-1.06)                                  |
| Income, <5000 vs >5000                                    | 1.08 (0.94-1.25)                               | 1.09 (0.96-1.24)                                      | 1.19 (0.99-1.44)                                  |
| Education, high vs. low <sup>a</sup>                      | 1.05 (0.90-1.23)                               | 1.12 (0.97-1.29)                                      | 1.12 (0.91-1.36)                                  |
| Hours per week, vs. <40 hours                             |                                                |                                                       |                                                   |
| 40-49 hours                                               | 0.88 (0.76-1.02)                               | 0.88 (0.78-1.00)                                      | 0.97 (0.80-1.17)                                  |
| 50-59 hours                                               | 1.44 (1.21-1.70) <sup>b</sup>                  | 1.47 (1.26-1.72) <sup>b</sup>                         | 1.65 (1.33-2.06) <sup>b</sup>                     |
| 60 hours or more                                          | 2.02 (1.66-2.46) <sup>b</sup>                  | 2.17 (1.78-2.65) <sup>b</sup>                         | 2.33 (1.80-3.02) <sup>b</sup>                     |
| Number of images reading per day, vs. <70                 |                                                |                                                       |                                                   |
| 70-179                                                    | 1.20 (1.05-1.38) <sup>b</sup>                  | 1.16 (1.03-1.32) <sup>b</sup>                         | 1.17 (0.96-1.42)                                  |
| 180 or more                                               | 1.77 (1.50-2.08) <sup>b</sup>                  | 1.72 (1.48-2.00) <sup>b</sup>                         | 1.73 (1.39-2.16) <sup>b</sup>                     |
| Hospital grade, tertiary vs. secondary or low             | 1.15 (1.01-1.30) <sup>b</sup>                  | 1.25 (1.12-1.39) <sup>b</sup>                         | 1.16 (0.99-1.36)                                  |
| Working equipment, MRI or CT vs. others                   | 1.28 (1.14-1.44) <sup>b</sup>                  | 1.26 (1.14-1.41) <sup>b</sup>                         | 1.29 (1.11-1.50) <sup>b</sup>                     |
| Autonomy, disagree or neutral vs. agree                   | 1.69 (1.47-1.94) <sup>b</sup>                  | 1.60 (1.38-1.84) <sup>b</sup>                         | 1.73 (1.44-2.09) <sup>b</sup>                     |
| Less control, disagree or neutral vs. agree               | 1.37 (1.17-1.61) <sup>b</sup>                  | 1.26 (1.09-1.46) <sup>b</sup>                         | 1.38 (1.12-1.70) <sup>b</sup>                     |
| Meaningful work, disagree or neutral vs. agree            | 1.49 (1.27-1.75) <sup>b</sup>                  | 1.51 (1.30-1.75) <sup>b</sup>                         | 1.37 (1.12-1.68) <sup>b</sup>                     |
| Reward from work, disagree or neutral vs. agree           | 0.91 (0.80-1.04) <sup>b</sup>                  | 0.90 (0.80-1.02)                                      | 0.90 (0.76-1.07)                                  |
| Effective support staff, disagree or neutral vs. agree    | 1.28 (1.12-1.44) <sup>b</sup>                  | 1.35 (1.18-1.54) <sup>b</sup>                         | 1.19 (0.99-1.42)                                  |
| Effective support facility, disagree or neutral vs. agree | 1.41 (1.21-1.65) <sup>b</sup>                  | 1.34 (1.17-1.55) <sup>b</sup>                         | 1.58 (1.29-1.94) <sup>b</sup>                     |

<sup>a</sup> Education level was categorized as bachelor's degree and below and graduate degree and above. <sup>b</sup> *P* < .05 with multiple testing correction by Hochberg method.

Abbreviation: AI=artificial intelligence. MRI=magnetic resonance imaging. CT=computerized tomography.

**eTable 11.** Association of AI Use with Burnout among Radiologists by Geographic Locations

|                                    | Eastern China    |                             | Central China    |                             | Western China    |                             | Northeast China  |                             |
|------------------------------------|------------------|-----------------------------|------------------|-----------------------------|------------------|-----------------------------|------------------|-----------------------------|
|                                    | OR (95%CI)       | <i>P</i> value <sup>a</sup> | OR (95%CI)       | <i>P</i> value <sup>a</sup> | OR (95%CI)       | <i>P</i> value <sup>a</sup> | OR (95%CI)       | <i>P</i> value <sup>a</sup> |
| <b>Burnout</b>                     |                  |                             |                  |                             |                  |                             |                  |                             |
| AI group vs. Non-AI group          | 1.14 (0.98-1.34) | .09                         | 1.41 (1.12-1.78) | .003                        | 1.08 (0.91-1.29) | .37                         | 1.33 (1.01-1.75) | .04                         |
| Regular vs. never or infrequent    | 1.11 (0.95-1.30) | .20                         | 1.39 (1.10-1.76) | .01                         | 1.05 (0.88-1.26) | .57                         | 1.33 (0.99-1.77) | .11                         |
| Consistent vs. never or infrequent | 1.44 (1.01-2.05) | .08                         | 1.75 (0.95-3.25) | .07                         | 1.38 (0.91-2.09) | .27                         | 1.34 (0.82-2.20) | .24                         |
| <b>Emotional exhaustion</b>        |                  |                             |                  |                             |                  |                             |                  |                             |
| AI group vs. Non-AI group          | 1.15 (0.98-1.34) | .08                         | 1.50 (1.19-1.90) | <.001                       | 1.08 (0.90-1.29) | .40                         | 1.36 (1.01-1.76) | .04                         |
| Regular vs. never or infrequent    | 1.08 (0.92-1.27) | .34                         | 1.49 (1.18-1.89) | .002                        | 1.07 (0.89-1.29) | .45                         | 1.33 (0.99-1.78) | .11                         |
| Consistent vs. never or infrequent | 1.69 (1.17-2.44) | .01                         | 1.65 (0.90-3.01) | .10                         | 1.10 (0.73-1.67) | .64                         | 1.89 (0.83-2.25) | .21                         |
| <b>Depersonalization</b>           |                  |                             |                  |                             |                  |                             |                  |                             |
| AI group vs. Non-AI group          | 1.09 (0.92-1.27) | .34                         | 1.17 (0.92-1.49) | .20                         | 1.04 (0.86-1.26) | .67                         | 1.13 (0.85-1.51) | .40                         |
| Regular vs. never or infrequent    | 1.03 (0.87-1.22) | .71                         | 1.11 (0.87-1.42) | .41                         | 1.00 (0.81-1.21) | .95                         | 1.01 (0.74-1.39) | .93                         |
| Consistent vs. never or infrequent | 1.39 (0.99-1.94) | .12                         | 2.11 (1.19-3.75) | .02                         | 1.48 (0.97-2.27) | .14                         | 2.82 (1.07-3.11) | .06                         |

Models were adjusted for individual and professional characteristics, psychological factors, workload score, and AI acceptance, with the exception of geographic location. All analyses were calculated using inverse propensity weighting. <sup>a</sup>*P* value was corrected by Hochberg method for multiple testing.

Abbreviation: AI=artificial intelligence. OR=odds ratio. CI=confidence interval.
