# Supplementary material for: Artificial Intelligence and Radiologist Burnout
Source: PubMed Central journal article supplement (PMC11584928; doi:10.1001/jamanetworkopen.2024.48714), 2024-11-22
Supplement: jamanetwopen-e2448714-s002.pdf [file jamanetwopen-e2448714-s002.pdf]

## Data Sharing Statement

Liu. Artificial Intelligence and Radiologist Burnout. *JAMA Netw Open*. Published November 22, 2024. doi:10.1001/jamanetworkopen.2024.48714

### Data

**Data available:** No
